# Supplementary material for: A series of reaction-controlled coordination polymers constructed from bis(imidazole) and tetrafluoroterephthalic acid ligands: syntheses, structural diversities, properties
Source: Royal Society of Chemistry journal article supplement (doi:10.1039/c5ce01423a), 2015-01-01

## Supporting information for

# A series of reaction-controlled coordination polymers constructed from bis(imidazole) and tetrafluoroterephthalic acid ligands: syntheses, structural diversities, properties

Xiu-Yuan Li,<sup>a</sup> Meng Liu,<sup>a</sup> Ke-Fen Yue,<sup>\*a</sup> Ya-Pan Wu,<sup>\*b</sup> Tian He,<sup>a</sup> Ni Yan,<sup>a</sup> Yao-Yu

Wang<sup>a</sup>

<sup>a</sup>Key Laboratory of Synthetic and Natural Functional Molecule Chemistry of the  
Ministry of Education, College of Chemistry & Materials Science, Northwest  
University, Xi'an 710069, China.

<sup>b</sup>College of Materials Science and Engineering, Research Institute of Materials, China  
Three Gorges University, Yichang 443002, China.

1. **Table S1** The selected bond distances (Å) and angles (°) for **1-7**.
2. **Table S2** Hydrogen-bonding lengths (Å) and angles (°) in **1, 4-7**.
3. **Table S3** cell parameters of **1a** and **1b**.
4. **Fig. S1** View of O-H...O intermolecular interactions in **1**.
5. **Fig. S2** View of C-H...F intermolecular interactions in **1**.
6. **Fig. S3** View of C-H...F intramolecular interactions in **2**.
7. **Fig. S4** View of C-H...F intermolecular interactions in **3**.
8. **Fig. S5** View of C-H...F intermolecular interactions in **6**.
9. **Fig. S6** PXRD patterns of **1-7**.
10. **Fig. S7** TGA curves of **1-7**.
11. **Fig. S8** PXRD patterns of **1, 1a** and **1b**.

1. **Table S1.** Selected bond distances (Å) and angles (°) for **1-7**.

| <b>1</b>            |            |                   |            |
|---------------------|------------|-------------------|------------|
| Co(1)-O(1)          | 1.9413(17) | Co(1)-O(1)#1      | 1.9413(17) |
| Co(1)-N(1)#1        | 2.001(2)   | Co(1)-N(1)        | 2.001(2)   |
| O(1)-Co(1)-O(1)#1   | 113.19(11) | O(1)-Co(1)-N(1)#1 | 104.20(8)  |
| O(1)#1-Co(1)-N(1)#1 | 111.46(8)  | O(1)-Co(1)-N(1)   | 111.46(8)  |
| O(1)#1-Co(1)-N(1)   | 104.20(8)  | N(1)#1-Co(1)-N(1) | 112.57(12) |
| <b>2</b>            |            |                   |            |
| Cd(1)-O(4)          | 2.202(12)  | Cd(1)-N(1)        | 2.209(12)  |
| Cd(1)-O(2)#1        | 2.281(10)  | Cd(1)-O(3)        | 2.316(11)  |
| Cd(1)-O(1)          | 2.363(11)  | Cd(1)-O(2)        | 2.401(10)  |
| Cd(2)-N(3)          | 2.200(12)  | Cd(2)-O(7)        | 2.249(11)  |
| Cd(2)-O(6)          | 2.258(10)  | Cd(2)-O(5)#2      | 2.313(10)  |
| Cd(2)-O(8)          | 2.390(11)  | Cd(2)-O(5)        | 2.562(10)  |
| O(2)-Cd(1)#3        | 2.281(10)  | O(5)-Cd(2)#6      | 2.313(10)  |
| O(4)-Cd(1)-N(1)     | 95.7(5)    | O(4)-Cd(1)-O(2)#1 | 87.1(4)    |
| N(1)-Cd(1)-O(2)#1   | 108.5(4)   | O(4)-Cd(1)-O(3)   | 169.7(5)   |
| N(1)-Cd(1)-O(3)     | 91.6(5)    | O(2)#1-Cd(1)-O(3) | 83.7(4)    |
| O(4)-Cd(1)-O(1)     | 88.8(5)    | N(1)-Cd(1)-O(1)   | 158.2(4)   |
| O(2)#1-Cd(1)-O(1)   | 92.9(4)    | O(3)-Cd(1)-O(1)   | 87.0(5)    |
| O(4)-Cd(1)-O(2)     | 94.6(4)    | N(1)-Cd(1)-O(2)   | 104.2(4)   |
| O(2)#1-Cd(1)-O(2)   | 146.9(2)   | O(3)-Cd(1)-O(2)   | 90.6(4)    |
| O(1)-Cd(1)-O(2)     | 54.1(4)    | N(3)-Cd(2)-O(7)   | 98.4(5)    |
| N(3)-Cd(2)-O(6)     | 156.9(4)   | O(7)-Cd(2)-O(6)   | 92.5(4)    |
| N(3)-Cd(2)-O(5)#2   | 104.9(4)   | O(7)-Cd(2)-O(5)#2 | 88.3(4)    |
| O(6)-Cd(2)-O(5)#2   | 95.7(4)    | N(3)-Cd(2)-O(8)   | 92.8(5)    |
| O(7)-Cd(2)-O(8)     | 164.2(5)   | O(6)-Cd(2)-O(8)   | 81.2(4)    |
| O(5)#2-Cd(2)-O(8)   | 78.0(4)    | N(3)-Cd(2)-O(5)   | 103.8(4)   |
| O(7)-Cd(2)-O(5)     | 107.3(4)   | O(6)-Cd(2)-O(5)   | 53.3(4)    |

|                    |           |                    |           |
|--------------------|-----------|--------------------|-----------|
| O(5)#2-Cd(2)-O(5)  | 144.8(3)  | O(8)-Cd(2)-O(5)    | 80.6(4)   |
| C(2)-N(1)-Cd(1)    | 129.9(11) | C(3)-N(1)-Cd(1)    | 123.1(10) |
| C(16)-N(3)-Cd(2)   | 128.6(10) | C(17)-N(3)-Cd(2)   | 124.7(11) |
| C(7)-O(1)-Cd(1)    | 93.3(10)  | C(7)-O(2)-Cd(1)#3  | 124.5(9)  |
| C(7)-O(2)-Cd(1)    | 88.1(8)   | Cd(1)#3-O(2)-Cd(1) | 115.4(4)  |
| C(28)#4-O(3)-Cd(1) | 141.7(11) | C(28)#5-O(4)-Cd(1) | 131.6(11) |
| C(21)-O(5)-Cd(2)#6 | 122.4(9)  | C(21)-O(5)-Cd(2)   | 83.2(8)   |
| Cd(2)#6-O(5)-Cd(2) | 109.9(4)  | C(21)-O(6)-Cd(2)   | 100.6(9)  |
| C(14)-O(7)-Cd(2)   | 112.3(9)  | C(14)#2-O(8)-Cd(2) | 162.7(12) |

### 3

|                     |            |                     |            |
|---------------------|------------|---------------------|------------|
| Ni(1)-N(1)#1        | 2.018(3)   | Ni(1)-N(1)          | 2.018(3)   |
| Ni(1)-O(1)          | 2.097(3)   | Ni(1)-O(1)#1        | 2.097(3)   |
| Ni(1)-O(2)#1        | 2.204(3)   | Ni(1)-O(2)          | 2.204(3)   |
| N(1)#1-Ni(1)-N(1)   | 95.8(2)    | N(1)#1-Ni(1)-O(1)   | 167.11(13) |
| N(1)-Ni(1)-O(1)     | 91.40(13)  | N(1)#1-Ni(1)-O(1)#1 | 91.40(13)  |
| N(1)-Ni(1)-O(1)#1   | 167.11(13) | O(1)-Ni(1)-O(1)#1   | 83.63(17)  |
| N(1)#1-Ni(1)-O(2)#1 | 96.02(12)  | N(1)-Ni(1)-O(2)#1   | 107.35(12) |
| O(1)-Ni(1)-O(2)#1   | 91.98(11)  | O(1)#1-Ni(1)-O(2)#1 | 61.13(11)  |
| N(1)#1-Ni(1)-O(2)   | 107.35(12) | N(1)-Ni(1)-O(2)     | 96.02(12)  |
| O(1)-Ni(1)-O(2)     | 61.13(11)  | O(1)#1-Ni(1)-O(2)   | 91.98(11)  |
| O(2)#1-Ni(1)-O(2)   | 144.99(15) |                     |            |

### 4

|                    |           |                     |            |
|--------------------|-----------|---------------------|------------|
| Co(1)-O(1)#1       | 2.094(4)  | Co(1)-O(1)          | 2.094(4)   |
| Co(1)-O(3)#1       | 2.094(4)  | Co(1)-O(3)          | 2.094(4)   |
| Co(1)-O(1W)        | 2.120(4)  | Co(1)-O(1W)#1       | 2.120(4)   |
| O(1)#1-Co(1)-O(1)  | 180.0(2)  | O(1)#1-Co(1)-O(3)#1 | 93.88(18)  |
| O(1)-Co(1)-O(3)#1  | 86.12(18) | O(1)#1-Co(1)-O(3)   | 86.12(18)  |
| O(1)-Co(1)-O(3)    | 93.88(18) | O(3)#1-Co(1)-O(3)   | 180.000(2) |
| O(1)#1-Co(1)-O(1W) | 92.34(15) | O(1)-Co(1)-O(1W)    | 87.66(15)  |

|                      |            |                    |           |
|----------------------|------------|--------------------|-----------|
| O(3)#1-Co(1)-O(1W)   | 90.42(15)  | O(3)-Co(1)-O(1W)   | 89.58(15) |
| O(1)#1-Co(1)-O(1W)#1 | 87.66(15)  | O(1)-Co(1)-O(1W)#1 | 92.34(15) |
| O(3)#1-Co(1)-O(1W)#1 | 89.58(15)  | O(3)-Co(1)-O(1W)#1 | 90.42(15) |
| O(1W)-Co(1)-O(1W)#1  | 180.000(1) |                    |           |

## 5

|                      |            |                      |            |
|----------------------|------------|----------------------|------------|
| Cd(1)-O(1)#1         | 2.251(3)   | Cd(1)-O(1)           | 2.251(3)   |
| Cd(1)-O(3)           | 2.278(3)   | Cd(1)-O(3)#1         | 2.278(3)   |
| Cd(1)-O(1W)#1        | 2.312(3)   | Cd(1)-O(1W)          | 2.312(3)   |
| O(1)#1-Cd(1)-O(1)    | 180.000(1) | O(1)#1-Cd(1)-O(3)    | 94.07(16)  |
| O(1)-Cd(1)-O(3)      | 85.93(16)  | O(1)#1-Cd(1)-O(3)#1  | 85.93(16)  |
| O(1)-Cd(1)-O(3)#1    | 94.07(16)  | O(3)-Cd(1)-O(3)#1    | 180.00(19) |
| O(1)#1-Cd(1)-O(1W)#1 | 91.07(13)  | O(1)-Cd(1)-O(1W)#1   | 88.93(13)  |
| O(3)-Cd(1)-O(1W)#1   | 87.85(13)  | O(3)#1-Cd(1)-O(1W)#1 | 92.15(13)  |
| O(1)#1-Cd(1)-O(1W)   | 88.93(13)  | O(1)-Cd(1)-O(1W)     | 91.07(13)  |
| O(3)-Cd(1)-O(1W)     | 92.15(13)  | O(3)#1-Cd(1)-O(1W)   | 87.85(13)  |
| O(1W)#1-Cd(1)-O(1W)  | 180.000(1) |                      |            |

## 6

|                 |            |                 |           |
|-----------------|------------|-----------------|-----------|
| Cd(1)-N(4)      | 2.247(5)   | Cd(1)-O(4)      | 2.282(4)  |
| Cd(1)-N(2)      | 2.318(5)   | Cd(1)-O(3)      | 2.319(5)  |
| Cd(1)-O(2)      | 2.407(4)   | Cd(1)-O(1)      | 2.460(5)  |
| Cd(2)-N(6)      | 2.266(5)   | Cd(2)-O(6)      | 2.274(4)  |
| Cd(2)-N(8)      | 2.315(5)   | Cd(2)-O(8)      | 2.333(5)  |
| Cd(2)-O(9)      | 2.422(5)   | Cd(2)-O(10)     | 2.423(5)  |
| Cd(3)-N(12)     | 2.221(5)   | Cd(3)-O(12)     | 2.262(5)  |
| Cd(3)-N(10)     | 2.288(5)   | Cd(3)-O(15)     | 2.323(6)  |
| Cd(3)-O(13)     | 2.332(4)   | Cd(3)-O(11)     | 2.580(5)  |
| N(4)-Cd(1)-O(4) | 105.94(18) | N(4)-Cd(1)-N(2) | 88.62(18) |
| O(4)-Cd(1)-N(2) | 161.85(19) | N(4)-Cd(1)-O(3) | 105.9(2)  |
| O(4)-Cd(1)-O(3) | 84.56(19)  | N(2)-Cd(1)-O(3) | 81.0(2)   |

|                   |            |                   |            |
|-------------------|------------|-------------------|------------|
| N(4)-Cd(1)-O(2)   | 150.44(18) | O(4)-Cd(1)-O(2)   | 77.69(17)  |
| N(2)-Cd(1)-O(2)   | 95.08(18)  | O(3)-Cd(1)-O(2)   | 103.62(19) |
| N(4)-Cd(1)-O(1)   | 96.13(18)  | O(4)-Cd(1)-O(1)   | 87.44(17)  |
| N(2)-Cd(1)-O(1)   | 101.99(18) | O(3)-Cd(1)-O(1)   | 157.84(19) |
| O(2)-Cd(1)-O(1)   | 54.39(17)  | N(6)-Cd(2)-O(6)   | 104.06(18) |
| N(6)-Cd(2)-N(8)   | 89.14(19)  | O(6)-Cd(2)-N(8)   | 163.28(19) |
| N(6)-Cd(2)-O(8)   | 107.2(2)   | O(6)-Cd(2)-O(8)   | 84.36(19)  |
| N(8)-Cd(2)-O(8)   | 81.9(2)    | N(6)-Cd(2)-O(9)   | 153.12(18) |
| O(6)-Cd(2)-O(9)   | 77.69(16)  | N(8)-Cd(2)-O(9)   | 95.25(18)  |
| O(8)-Cd(2)-O(9)   | 99.70(19)  | N(6)-Cd(2)-O(10)  | 98.47(17)  |
| O(6)-Cd(2)-O(10)  | 87.44(16)  | N(8)-Cd(2)-O(10)  | 100.92(19) |
| O(8)-Cd(2)-O(10)  | 154.27(19) | O(9)-Cd(2)-O(10)  | 54.65(16)  |
| N(12)-Cd(3)-O(12) | 146.02(19) | N(12)-Cd(3)-N(10) | 87.97(19)  |
| O(12)-Cd(3)-N(10) | 105.24(19) | N(12)-Cd(3)-O(15) | 118.3(2)   |
| O(12)-Cd(3)-O(15) | 94.7(2)    | N(10)-Cd(3)-O(15) | 82.42(19)  |
| N(12)-Cd(3)-O(13) | 89.79(18)  | O(12)-Cd(3)-O(13) | 87.63(18)  |
| N(10)-Cd(3)-O(13) | 159.72(19) | O(15)-Cd(3)-O(13) | 80.93(17)  |
| N(12)-Cd(3)-O(11) | 93.71(18)  | O(12)-Cd(3)-O(11) | 52.83(17)  |
| N(10)-Cd(3)-O(11) | 105.63(19) | O(15)-Cd(3)-O(11) | 147.5(2)   |
| O(13)-Cd(3)-O(11) | 94.63(18)  |                   |            |

7

|                   |          |                   |          |
|-------------------|----------|-------------------|----------|
| Cd(1)-N(3)        | 2.244(8) | Cd(1)-N(1)#1      | 2.269(7) |
| Cd(1)-O(5)        | 2.312(7) | Cd(1)-O(4)        | 2.383(7) |
| Cd(1)-O(2)        | 2.468(6) | Cd(1)-O(3)        | 2.545(7) |
| Cd(1)-O(1)        | 2.545(6) | N(1)-Cd(1)#2      | 2.269(7) |
| N(3)-Cd(1)-N(1)#1 | 175.2(3) | N(3)-Cd(1)-O(5)   | 90.6(3)  |
| N(1)#1-Cd(1)-O(5) | 91.4(3)  | N(3)-Cd(1)-O(4)   | 92.0(3)  |
| N(1)#1-Cd(1)-O(4) | 89.7(3)  | O(5)-Cd(1)-O(4)   | 133.9(2) |
| N(3)-Cd(1)-O(2)   | 84.1(3)  | N(1)#1-Cd(1)-O(2) | 91.6(3)  |

|                   |          |                   |         |
|-------------------|----------|-------------------|---------|
| O(5)-Cd(1)-O(2)   | 143.0(2) | O(4)-Cd(1)-O(2)   | 83.0(2) |
| N(3)-Cd(1)-O(3)   | 91.7(3)  | N(1)#1-Cd(1)-O(3) | 92.9(3) |
| O(5)-Cd(1)-O(3)   | 81.1(2)  | O(4)-Cd(1)-O(3)   | 52.8(2) |
| O(2)-Cd(1)-O(3)   | 135.5(2) | N(3)-Cd(1)-O(1)   | 89.5(2) |
| N(1)#1-Cd(1)-O(1) | 86.1(3)  | O(5)-Cd(1)-O(1)   | 91.3(2) |
| O(4)-Cd(1)-O(1)   | 134.8(2) | O(2)-Cd(1)-O(1)   | 52.2(2) |
| O(3)-Cd(1)-O(1)   | 172.3(2) |                   |         |

symmetrical codes: **1:** #1  $x, -y+1/2, -z+1/2$ . **2:** #1  $-x+1/2, y-1/2, -z+1/2$ ; #2  $-x+3/2, y+1/2, -z+1/2$ ; #3  $-x+1/2, y+1/2, -z+1/2$ ; #4  $-x+1, -y+1, -z$ ; #5  $x-1/2, -y+3/2, z+1/2$ ; #6  $-x+3/2, y-1/2, -z+1/2$ . **3:** #1  $-x+1/2, y, -z+1/2$ . **4:** #1  $-x+1, -y+1, -z+1$ . **5:** #1  $-x, -y, -z+1$ . **7:** #1  $x+1, y, z+1$ ; #2  $x-1, y, z-1$ .

## 2. Table S2 Hydrogen-bonding lengths (Å) and angles (°) in **1**, **4-7**.

| D-H $\cdots$ A               | d(D-H)    | d(H $\cdots$ A) | d(D $\cdots$ A) | $\angle$ (DHA) |
|------------------------------|-----------|-----------------|-----------------|----------------|
| <b>1</b>                     |           |                 |                 |                |
| O(1W)-H(1) $\cdots$ O(2)     | 0.824(10) | 2.125(17)       | 2.929(3)        | 165(5)         |
| <b>4</b>                     |           |                 |                 |                |
| O(1W)-H(1WA) $\cdots$ O(2)#1 | 0.83      | 1.81            | 2.633(6)        | 168.3          |
| O(1W)-H(1WB) $\cdots$ O(4)#1 | 0.83      | 1.93            | 2.726(6)        | 160.6          |
| O(5)-H(5) $\cdots$ O(4)#1    | 0.822(10) | 2.41(15)        | 2.845(9)        | 114(13)        |
| <b>5</b>                     |           |                 |                 |                |
| O(1W)-H(1WA) $\cdots$ O(2)   | 0.84      | 2.17            | 2.660(5)        | 117.4          |
| O(1W)-H(1WB) $\cdots$ O(4)#1 | 0.83      | 1.99            | 2.742(5)        | 150.6          |
| O(5)-H(5) $\cdots$ O(4)#2    | 0.822(10) | 2.09(9)         | 2.836(9)        | 152(17)        |
| <b>6</b>                     |           |                 |                 |                |
| O(3)-H(3W) $\cdots$ O(7)#1   | 0.818(10) | 1.93(5)         | 2.677(6)        | 152(11)        |
| O(8)-H(8W) $\cdots$ O(5)#2   | 0.820(10) | 2.04(9)         | 2.645(6)        | 130(10)        |
| O(15)-H(15W) $\cdots$ O(14)  | 0.822(10) | 1.82(3)         | 2.591(7)        | 157(8)         |

---

7

---

O(5)-H(1W)···O(1)#1      0.82(2)      1.85(2)      2.675(9)      175(12)

---

symmetrical codes: **4**: #1 -x+1, -y+1, -z+1. **5**: #1 -x, -y, -z+1. #2 x+1, y, z. **6**: #1 x+1, y, z. #2 x-1, y, z. **7**: #1 -x+2, -y, -z+1.

### 3. Table S3 cell parameters of **1a** and **1b**.

---

| complex                    | <b>1a</b> | <b>1b</b> |
|----------------------------|-----------|-----------|
| <i>a</i> (Å)               | 18.135    | 18.05     |
| <i>b</i> (Å)               | 13.852    | 13.75     |
| <i>c</i> (Å)               | 9.347     | 9.41      |
| $\alpha$ (°)               | 90        | 90        |
| $\beta$ (°)                | 90        | 90        |
| $\gamma$ (°)               | 90        | 90        |
| <i>V</i> (Å <sup>3</sup> ) | 2348      | 2324      |

---

### 4. Fig. S1 View of O-H···O intermolecular interactions in **1**.

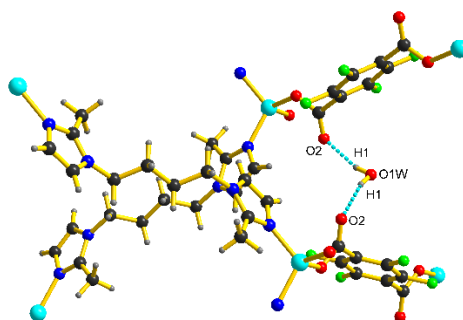

### 5. Fig. S2 View of C-H···F intermolecular interactions in **1**.

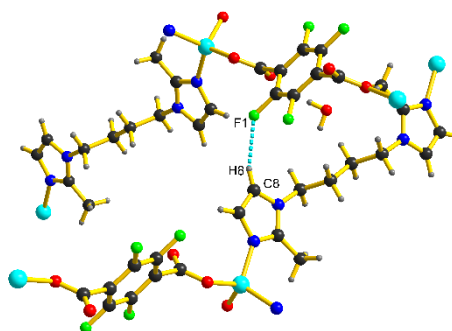

6. **Fig. S3** View of C-H...F intramolecular interactions in **2**.

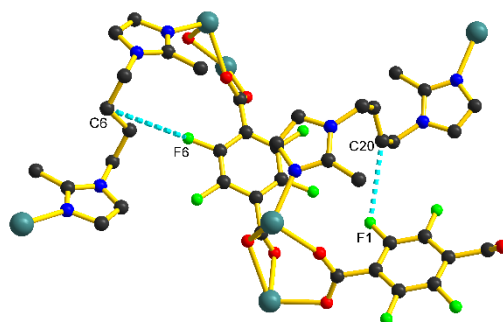

7. **Fig. S4** View of C-H...F intermolecular interactions in **3**.

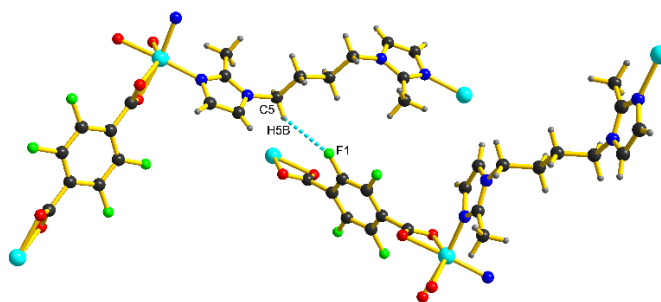

8. **Fig. S5** View of C-H...F intermolecular interactions in **6**.

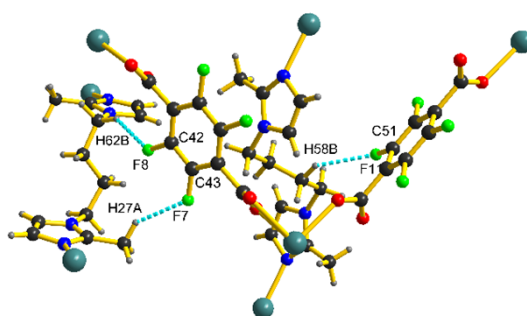

9. **Fig. S6** PXRD patterns for **1-7**.



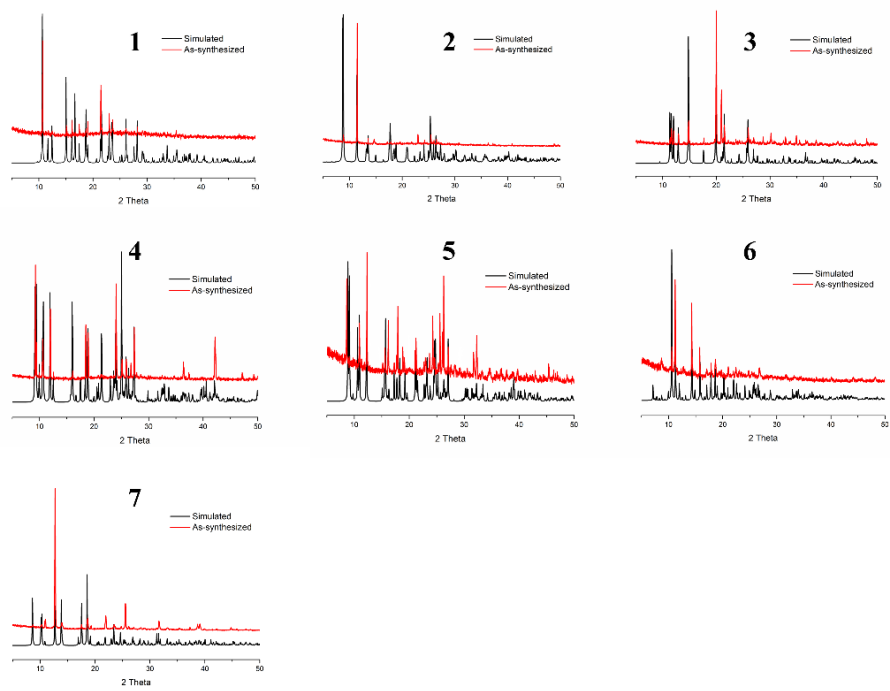

10. Fig. S7 TGA curves of 1-7.

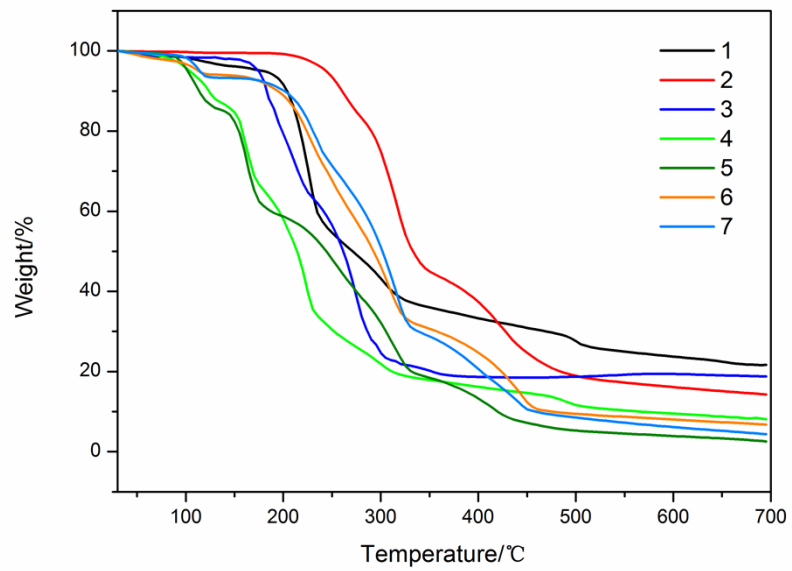

11. **Fig. S8** PXRD patterns of **1**, **1a** and **1b**.

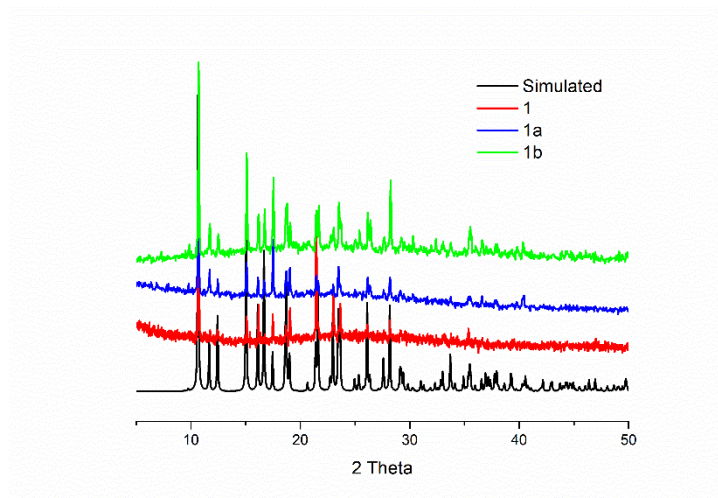

Supplement: c5ce01423a1.pdf [file c5ce01423a1.pdf]
